# Supplementary material
Source: Research Square preprint supplement (doi:10.21203/rs.3.rs-8764373/v1)
Supplement: Supplementary file 1 [file 43de856e979b43d43d3c173f.docx]

**Supporting Information**

Structure-Optimization and Structure-Activity Relationship of Diphenylpyrazinyl Aminoalkoxyacetic Acid Derivatives: Piperidine Substitution and Hydrophobic Modification as Key Strategies for IP Receptor Agonists

Xianrong Cai,*a Juping Cheng, Yuhe Wang,a Guiying Liu,a Xiaoyan Ma,a Qingquan Fu,a Xiaoli An,*a and Zhenqiang Mu*b

*a School of Chemistry Engineering, Sichuan University of Science & Engineering, No.180 Xueyuan Street, Huixing Road, Zigong 643000, China*

*b Chongqing Key Laboratory of High Active Traditional Chinese Medicine Delivery System, Chongqing Medical and Pharmaceutical College, No. 82, University Town Middle Road, Shapingba District, Chongqing 410331, China*

**Contents**

[1. Chemistry 1](#_Toc220071574)

[2. Antiaggregatory Activity 14](#_Toc220071575)

[3. The Molecular Dynamics Simulation 16](#_Toc220071576)

[4. Mini-Ames Test of 4q-S using Salmonella typhimurium and Escherichia coli strains. 20](#_Toc220071577)

[5. hERG Safety Evaluation by Manual Patch-Clamp System 24](#_Toc220071578)

[6. The NMR spectra of compounds 7a, 7b, 14a, 14c, 14d, 14e, 14g, 14j, 14k, 14m, 14o, 3a-3i and 4a-4n 26](#_Toc220071579)

[**References** 68](#_Toc220071580)

# Chemistry

**General Information.** All commercially available reagents and solvents were used without further purification. The reaction mixture was analyzed by thin-layer chromatography (TLC) using silica gel plates and visualized by UV (254 or 365) or phosphomolybdic acid staining. Separation by column chromatography was using 200−300 mesh silica gel. 1H NMR and 13C NMR spectra were recorded with a Bruker AVANCE III 400 spectrometer or Bruker AVANCE III 600 spectrometer. New compounds were tested or prepared by HITACHI D-7000 or Primaide HPLC. High-resolution mass spectra were obtained from BioTOF-Q. All compounds used for biological evaluation have a purity of ≥95% by HPLC analysis. Compounds **5a**, **5b**, **13c**, **13d**, **13e**, **13e-R**, **13e-S**, **13g**, **13j**, **13k**, **13m** and **13o** were all available for purchase. 5-chloro-2,3-diphenylpyrazine **6**1, **13a**2, **4q-R and 4q-S**3 were synthesized according to the literature procedure.

General Procedure for Synthesis of Compounds 7a, 7b, 14a, 14c, 14d, 14e, 14g, 14j, 14k, 14m, and 14o.

**2-((5,6-diphenylpyrazin-2-yl)(isopropyl)amino)ethan-1-ol—methane (7a)[2]**

A mixture of 5-chloro-2,3-diphenylpyrazine **6** (2.50g, 9.39 mmol) and 2-(isopropylamino)ethanol **5** (1.45 g, 14.08 mmol) was stirred at 170°C for 36 h. The combined organic layers were sequentially washed with water and brine, then dried over anhydrous Na₂SO₄. After concentration under reduced pressure, the residual oil was purified by silica gel chromatography using petroleum ether/ethyl acetate (2:1) as the eluent to afford the target compound **7a** as a yellow solid (2.01 g, 55% yield). 1H NMR (600 MHz, CDCl3) *δ* 8.18 (s, 1H), 7.44 – 7.40 (m, 2H), 7.36 – 7.32 (m, 2H), 7.31 – 7.27 (m, 3H), 7.25 – 7.20 (m, 3H), 4.49– 4.35(m,1H), 3.73 (t, *J* = 6.5 Hz, 2H), 3.55 (t, *J* = 5.4 Hz, 2H), 1.83 (p, *J* = 6.1 Hz, 2H), 1.35 (d, *J* = 6.7 Hz, 6H). 13C NMR (150 MHz, CDCl3) *δ* 152.79, 149.08, 140.86, 139.24, 139.10, 129.84, 129.69, 128.76, 128.60, 128.57, 128.37, 127.59, 64.77, 47.98, 45.91, 20.54. HRMS (ESI+, m/z): calcd for C21H24N3O+: 334.1914 [M+H]+, found: 334.1911 [M+H]+.

Compounds **7b**, **14a**, **14c**, **14d**, **14e**, **14g**, **14j**, **14k**, **14m**, and **14o** were synthesized according to a procedure similar to that for **7a.**

**3-((5,6-diphenylpyrazin-2-yl)(isopropyl)amino)propan-1-ol (7b)**

1H NMR (600 MHz, CDCl3) *δ* 8.18 (s, 1H), 7.44 – 7.40 (m, 2H), 7.36 – 7.32 (m, 2H), 7.31 – 7.27 (m, 3H), 7.25 – 7.20 (m, 3H), 4.45 – 4.40(m,1H), 3.73 (t, *J* = 6.5 Hz, 2H), 3.55 (t, *J* = 5.4 Hz, 2H), 1.83 (p, *J* = 6.1 Hz, 2H), 1.35 (d, *J* = 6.7 Hz, 6H). 13C NMR (150 MHz, CDCl3) *δ* 152.15, 149.00, 139.71, 139.00, 138.88, 129.56, 129.33, 128.50, 128.24, 128.03, 127.86, 127.14, 58.74, 47.50, 38.87, 33.24, 20.29.

**(*R*)-(1-(5,6-diphenylpyrazin-2-yl)pyrrolidin-2-yl)methanol (14e-R)**

A mixture of 5-chloro-2,3-diphenylpyrazine **6** (1.0g, 3.76 mmol),**13e-R** (0.46 g, 4.51 mmol), and K₂CO₃ (0.83 g, 6.02 mmol) was dissolved in NMP (19 mL) and stirred at 120 °C for 24 hours. The combined organic layers were sequentially washed with water and brine, then dried over anhydrous Na₂SO₄. After concentrating the solvent under reduced pressure, the residual oil was purified by silica gel column chromatography using petroleum ether–ethyl acetate (2:1) as the eluent to afford the target compound **14e-R** as a yellow solid (1.25g, 100%).1H NMR (600 MHz, CDCl3) *δ* 8.00 (s, 1H), 7.38 – 7.35 (m, 2H), 7.32 – 7.29 (m, 2H), 7.27 – 7.23 (m, 4H), 7.22 – 7.18 (m, 3H), 4.40 – 4.33 (m, 1H), 3.78 – 3.74 (m, 1H), 3.70 – 3.62 (m, 2H), 3.54 – 3.48 (m, 1H), 2.14 – 2.06 (m, 2H), 2.04 – 1.99 (m, 1H), 1.81 – 1.74 (m, 1H). 13C NMR (150 MHz, CDCl3) *δ* 151.46, 148.63, 140.84, 139.03, 138.71, 129.61, 129.46, 128.91, 128.55, 128.33, 128.12, 127.34, 68.02, 62.04, 48.50, 29.20, 24.54.

Compounds **14a-14p** were synthesized according to a procedure similar to that for **14e-R**

**(1-(5,6-diphenylpyrazin-2-yl)azetidin-2-yl)methanol (14a)**

1H NMR (600 MHz, CDCl3) *δ* 7.88 (s, 1H), 7.35 – 7.33 (m, 2H), 7.31 – 7.29 (m, 2H), 7.26 – 7.21 (m, 6H), 4.65 – 4.60(m, 1H), 4.09 – 4.01 (m, 2H), 3.86– 3.83 (m,1H), 3.74 – 3.72 m, 1H), 2.41 – 2.36(m, 1H), 2.30 – 2.24 (m, 1H). 13C NMR (150 MHz, CDCl3) *δ* 152.95, 148.90, 141.99, 138.80, 138.36, 129.39, 129.35, 128.51, 128.24, 128.01, 127.72, 127.39, 67.18, 66.72, 47.54, 19.81.

**(1-(5,6-diphenylpyrazin-2-yl)azetidin-3-yl)methanol (14c)**

1H NMR (400 MHz, CDCl3) *δ* 7.80 (s, 1H), 7.44 – 7.38 (m, 2H), 7.34 – 7.29 (m, 2H), 7.26 – 7.18 (m, 6H), 4.19 (t, *J* = 8.2 Hz, 2H), 3.90 (dd, *J* = 8.4, 5.2 Hz, 2H), 3.75 (d, *J* = 6.3 Hz, 2H), 2.98 – 2.87 (m, 1H). 13C NMR (100 MHz, CDCl3) *δ* 154.25, 149.86, 140.79, 139.26, 139.14, 129.92, 129.57, 128.39, 128.13, 128.08, 127.36, 127.31, 64.25, 52.96, 32.36.

**1-(5,6-diphenylpyrazin-2-yl)azetidin-3-ol (14d)**

1H NMR (400 MHz, CDCl3) *δ* 7.78 (s, 1H), 7.44 – 7.39 (m, 2H), 7.35 – 7.31 (m, 2H), 7.31 – 7.24 (m, 6H), 4.69 – 4.59 (m, 1H), 4.31 (dd, *J* = 9.1, 6.5 Hz, 2H), 3.90 (dd, *J* = 9.3, 4.4 Hz, 2H). 13C NMR (100 MHz, CDCl3) *δ* 154.16, 149.88, 141.04, 139.16, 138.99, 129.90, 129.56, 128.47, 128.18, 128.12, 127.51, 127.47, 62.77, 60.53.

**1-(5,6-diphenylpyrazin-2-yl)pyrrolidin-3-ol (14g)**

1H NMR (600 MHz, CDCl3) *δ* 7.88 (s, 1H), 7.47 – 7.44 (m, 2H), 7.36 – 7.33 (m, 2H), 7.30 – 7.21 (m, 7H), 4.57 – 4.52 (m, 1H), 3.73 – 3.57 (m, 4H), 2.15 – 2.01 (m, 2H). 13C NMR (150 MHz, CDCl3) *δ* 151.25, 149.69, 139.69, 139.50, 139.46, 129.97, 129.55, 128.28, 128.12, 128.01, 127.49, 127.18, 70.65, 54.96, 44.50, 34.00.

**(1-(5,6-diphenylpyrazin-2-yl)pyrrolidin-3-yl)methanol (14j)**

1H NMR (600 MHz, CDCl3) *δ* 7.88 (s, 1H), 7.47 – 7.43 (m, 2H), 7.34 (d, *J* = 7.3 Hz, 2H), 7.29 – 7.18 (m, 7H), 3.76 – 3.51 (m, 6H), 3.36 (dd, *J* = 10.6, 6.6 Hz, 1H), 2.56 – 2.48 (m, 1H), 2.15 – 2.07 (m, 1H), 1.84 – 1.76 (m, 1H). 13C NMR (150 MHz, CDCl3) *δ* 151.18, 149.66, 139.60, 139.53, 132.09, 129.96, 129.51, 128.24, 128.10, 128.00, 127.57, 127.11, 64.45, 49.28, 46.02, 41.00, 27.91.

**(1-(5,6-diphenylpyrazin-2-yl)piperidin-2-yl)methanol (14k)**

1H NMR (600 MHz, CDCl3) *δ* 8.15 (s, 1H), 7.48 – 7.43 (m, 2H), 7.38 – 7.34 (m, 2H), 7.30 – 7.20 (m, 7H), 4.53 – 4.42 (m, 2H), 3.73 (t, *J* = 6.6 Hz, 2H), 2.99 – 2.90 (m, 2H), 1.87 – 1.82 (m, 2H), 1.77 – 1.72 (m, 1H), 1.58 – 1.54 (m, 2H). 13C NMR (150 MHz, CDCl3) *δ* 152.84, 149.10, 140.14, 139.43, 139.38, 129.93, 129.47, 128.27, 128.12, 128.00, 127.75, 127.25, 60.16, 45.02, 39.32, 32.72, 31.87.

**1-(5,6-diphenylpyrazin-2-yl)piperidin-3-ol (14m)**

1H NMR (600 MHz, CDCl3) *δ* 8.19 (s, 1H), 7.49 – 7.43 (m, 2H), 7.40 – 7.35 (m, 2H), 7.32 – 7.27 (m, 4H), 7.27 – 7.24 (m, 2H), 4.05 – 3.99 (m, 1H), 3.90 – 3.80 (m, 2H), 3.48 – 3.40 (m, 2H), 2.00 – 1.89 (m, 2H), 1.69 – 1.59 (m, 2H). 13C NMR (150 MHz, CDCl3) *δ* 153.13, 148.99, 140.64, 139.25, 129.92, 129.50, 128.36, 128.17, 128.16, 128.05, 127.37, 66.30, 51.49, 45.23, 32.78, 22.14.

**1-(5,6-diphenylpyrazin-2-yl)piperidin-4-ol (14o)**

1H NMR (600 MHz, CDCl3) *δ* 8.20 (s, 1H), 7.50 – 7.44 (m, 2H), 7.40 – 7.35 (m, 2H), 7.33 – 7.23 (m, 7H), 4.26 – 4.18 (m, 2H), 4.02 – 3.96 (m, 1H), 3.38 – 3.29 (m, 2H), 2.08 – 2.00 (m, 2H), 1.69 – 1.62 (m, 2H). 13C NMR (150 MHz, CDCl3) *δ* 152.67, 149.15, 140.49, 139.34, 139.30, 129.94, 129.50, 128.34, 128.16, 128.04, 127.75, 127.35, 67.77, 42.39, 33.84.

General Procedure for Synthesis of Compounds 3a-3i and 4a-4p.

2-(2-(2-((5,6-diphenylpyrazin-2-yl)(isopropyl)amino)ethoxy)-2-methylpropoxy)acetic acid (3i)4

A mixture of 5-chloro-2,3-diphenylpyrazine **6** (2.50g, 9.39 mmol) and 2-(isopropylamino)ethanol **5** (1.45 g, 14.08 mmol) was stirred at 170°C for 36 h. The combined organic layers were sequentially washed with water and brine, then dried over anhydrous Na₂SO₄. After concentration under reduced pressure, the residual oil was purified by silica gel chromatography using petroleum ether/ethyl acetate (2:1) as the eluent to afford the target compound **7a** as a yellow solid (2.01 g, 55% yield). 1H NMR (600 MHz, CDCl3) *δ* 8.18 (s, 1H), 7.44 – 7.40 (m, 2H), 7.36 – 7.32 (m, 2H), 7.31 – 7.27 (m, 3H), 7.25 – 7.20 (m, 3H), 4.49 – 4.35(m,1H), 3.73 (t, *J* = 6.5 Hz, 2H), 3.55 (t, *J* = 5.4 Hz, 2H), 1.83 (p, *J* = 6.1 Hz, 2H), 1.35 (d, *J* = 6.7 Hz, 6H). 13C NMR (150 MHz, CDCl3) *δ* 152.79, 149.08, 140.86, 139.24, 139.10, 129.84, 129.69, 128.76, 128.60, 128.57, 128.37, 127.59, 64.77, 47.98, 45.91, 20.54. HRMS (ESI+, m/z): calcd for C21H24N3O+: 334.1914 [M+H]+, found: 334.1911 [M+H]+.

**7a** (4.01 g, 12.04 mmol) and tetrabutylammonium hydrogen sulfate (2.04 g, 6.01 mmol) were dissolved in toluene (60 mL) and stirred vigorously. A 40% aqueous KOH solution (60 mL) was added dropwise in an ice bath, followed by tert-butyl 2-bromo-2-methylpropanoate added in two portions (total 3.22 g, 14.45 mmol). The mixture was heated to 50°C and stirred for 6 h. It was then diluted with ice water and extracted with ethyl acetate (EtOAc). The organic layer was washed with water and brine, dried over anhydrous Na2SO4, and concentrated under reduced pressure. The residue was purified by silica gel column chromatography (petroleum ether/ethyl acetate 4:1) to afford **8i** as a yellow oil (1.15g, 20% yield). 1H NMR (600 MHz, CDCl3) *δ* 8.15 (s, 1H), 7.48 – 7.44 (m, 2H), 7.40 – 7.35 (m, 2H), 7.32 – 7.20 (m, 5H), 4.79 (p, *J* = 6.5 Hz, 1H), 3.66 (s, 3H), 1.46 (s, 7H), 1.41 (s, 5H), 1.31 (d, *J* = 6.7 Hz, 5H). 13C NMR (150 MHz, CDCl3) *δ* 173.93, 152.09, 148.95, 139.73, 139.67, 130.00, 129.51, 128.16, 128.14, 127.98, 127.57, 127.11, 81.21, 78.10, 63.06, 46.50, 42.99, 28.09, 24.77, 20.40.

**8i** (1.15 g, 2.42 mmol) was dissolved in anhydrous THF (12 mL). A 2.5 M solution of LiAlH4 (1.94 mL, 4.84 mmol) was added dropwise in an ice bath, and the mixture was stirred for 1 h. Water and 1 N NaOH were added dropwise alternately in an ice bath until gas evolution ceased. The mixture was filtered through a pad of silica gel; the pad was washed with EtOAc. The combined filtrates were dried over anhydrous Na2SO4 and concentrated under reduced pressure to give **9i** (930mg, 95% yield). 1H NMR (600 MHz, CDCl3) *δ* 8.12 (s, 1H), 7.46 – 7.44 (m, 2H), 7.37 (dd, *J* = 8.0, 1.6 Hz, 2H), 7.29 – 7.22 (m, 7H), 4.72 (q, *J* = 6.7 Hz, 1H), 3.62 – 3.59 (m, 4H), 3.42 (s, 2H), 1.29 (s, 3H), 1.28 (s, 3H), 1.17 (s, 6H). 13C NMR (150 MHz, CDCl3) *δ* 152.16, 149.02, 139.87, 139.65, 139.61, 129.98, 129.50, 128.25, 128.17, 128.01, 127.51, 127.49, 127.20, 75.52, 69.69, 60.32, 46.64, 43.18, 22.06, 20.45.

**9i** (930 mg, 2.29 mmol) and tetrabutylammonium hydrogen sulfate (388 mg, 1.15 mmol) were dissolved in toluene (12 mL) and stirred vigorously. A 40% aqueous KOH solution (12 mL) was added dropwise in an ice bath, followed by tert-butyl bromoacetate (537 mg, 2.75 mmol). The mixture was stirred at room temperature for 3 h, diluted with ice water, and extracted with EtOAc. The organic layer was washed with water and brine, dried over anhydrous Na2SO4, and concentrated under reduced pressure. The residue was purified by silica gel column chromatography (petroleum ether/ethyl acetate 4:1) to give **10i** as a yellow oil (910mg, 76% yield). 1H NMR (600 MHz, CDCl3) *δ* 8.10 (s, 1H), 7.46 – 7.44 (m, 2H), 7.37 – 7.35 (m, 2H), 7.28 – 7.26 (m, 1H), 7.26 – 7.20 (m, 5H), 3.98 (s, 2H), 3.73 – 3.71(m, 1H), 3.66 (t, *J* = 7.2 Hz, 2H), 3.58 (t, *J* = 7.0 Hz, 2H), 3.42 (s, 2H), 1.46 (d, *J* = 2.6 Hz, 9H), 1.27 (d, *J* = 6.7 Hz, 6H), 1.21 (s, 6H). 13C NMR (150 MHz, CDCl3) *δ* 169.90, 152.13, 148.95, 139.58, 130.02, 129.51, 128.17, 128.14, 127.97, 127.58, 127.50, 127.11, 81.60, 77.98, 75.15, 69.38, 60.45, 46.48, 43.30, 28.27, 23.02, 20.40.

**10i** (910mg,1.75mmol) was dissolved in methanol (9 mL), and LiOH (420 mg, 17.5 mmol) was added in an ice bath. The mixture was stirred at room temperature overnight. The solvent was removed under reduced pressure, the residue was acidified with 1 N HCl, and the mixture was extracted with EtOAc (3 × 5 mL). The combined organic layers were dried over Na2SO4 and concentrated under reduced pressure. The residue was purified by silica gel column chromatography (petroleum ether/ethyl acetate 1:2) to afford **3i** as a yellow oil (502 mg, 62% yield). 1H NMR (600 MHz, CDCl3) *δ* 8.15 (s, 1H), 7.43 – 7.42(m, 2H), 7.35 – 7.32 (m, 2H), 7.29 – 7.27 (m, 1H), 7.26 – 7.21 (m, 5H), 4.73 (p, *J* = 6.6 Hz, 1H), 4.13 (s, 2H), 3.70 – 3.66 (m, 2H), 3.61 (t, *J* = 6.9 Hz, 2H), 3.47 (s, 2H), 1.28 (d, *J* = 6.8 Hz, 6H), 1.20 (s, 6H).13C NMR (150 MHz, CDCl3) *δ* 171.81, 171.57, 151.17, 148.36, 138.28, 137.92, 128.83, 128.41, 127.06, 126.84, 126.22, 125.95, 78.19, 74.68, 68.12, 59.37, 45.50, 41.59, 20.90, 19.23. HRMS (ESI+, m/z): calcd for C27H34N3O4+: 464.2544 [M+H]+, found: 464.2541 [M+H]+.

Compounds 3a-3h and 4a-4p were synthesized according to a procedure similar to that for 3i.

**2-(2-((5,6-diphenylpyrazin-2-yl)(isopropyl)amino)ethoxy)acetic acid (3a)**

1H NMR (600 MHz, CDCl3) *δ* 8.18 (s, 1H), 7.37 (d, *J* = 7.2 Hz, 2H), 7.31 – 7.27 (m, 2H), 7.23 – 7.16 (m, 6H), 4.70 (p, *J* = 6.9 Hz, 1H), 4.11 (s, 2H), 3.78 – 3.63 (m, 4H), 1.21 (d, *J* = 6.7 Hz, 6H). 13C NMR (150 MHz, CDCl3) *δ* 152.16, 149.31, 139.29, 139.23, 138.87, 129.79, 129.42, 128.18, 128.03, 127.90, 127.21, 127.09, 69.69, 69.18, 53.43, 46.45, 41.70, 20.17. HRMS (ESI+, m/z): calcd for C23H26N3O3+: 392.1969 [M+H]+, found: 392.1945 [M+H]+.

**2-(3-((5,6-diphenylpyrazin-2-yl)(isopropyl)amino)propoxy)acetic acid (3b)**

1H NMR (600 MHz, CDCl3) *δ* 8.17 (s, 1H), 7.44 – 7.40 (m, 2H), 7.34 – 7.31 (m, 2H), 7.30 – 7.19 (m, 7H), 4.86 (p, *J* = 6.3 Hz, 1H), 4.11 (s, 2H), 3.67 (t, *J* = 5.9 Hz, 2H), 3.59 – 3.54 (m, 2H), 2.05 – 1.93 (m, 2H), 1.27 (d, *J* = 6.8 Hz, 6H).13C NMR (151 MHz, CDCl3) *δ* 173.25, 152.14, 149.69, 139.32, 138.73, 138.48, 129.85, 129.48, 128.19, 128.07, 127.90, 127.23, 126.65, 69.64, 68.18, 46.40, 39.83, 29.52, 20.28. HRMS (ESI+, m/z): calcd for C24H28N3O3+: 406.2125 [M+H]+, found: 406.2127 [M+H]+.

**2-(2-(2-((5,6-diphenylpyrazin-2-yl)(isopropyl)amino)ethoxy)ethoxy)acetic acid (3c)**

1H NMR (600 MHz, CDCl3) *δ* 8.19 (s, 1H), 7.43 – 7.41 (m, 2H), 7.34 – 7.32 (m, 2H), 7.28 – 7.26 (m, 1H), 7.26 – 7.21 (m, 5H), 4.77 – 4.73 (m, 1H), 4.14 (s, 2H), 3.74 – 3.66 (m, 8H), 1.28 (d, *J* = 6.8 Hz, 6H). 13C NMR (150 MHz, CDCl3) *δ* 172.94, 152.21, 149.43, 139.26, 139.15, 138.81, 129.83, 129.45, 128.21, 128.08, 127.90, 127.27, 126.94, 71.04, 70.50, 69.68, 68.75, 46.55, 41.94, 20.26. HRMS (ESI+, m/z): calcd for C25H30N3O4+: 436.2231 [M+H]+, found: 4436.2216 [M+H]+.

**3-(5,6-diphenylpyrazin-2-yl)-2-methyl-6,9,12-trioxa-3-azatetradecan-14-oic acid (3d)**

**7a** (500 mg, 1.50 mmol) and tetrabutylammonium hydrogen sulfate (277 mg, 0.75 mmol) were dissolved in toluene (7.5 mL) and stirred vigorously. A 40% aqueous KOH solution (7.5 mL) was added dropwise in an ice bath, followed by tert-butyl bromoacetate (351 mg, 1.8 mmol). The mixture was stirred at room temperature for 3 h, diluted with ice water, and extracted with ethyl acetate. The organic layer was washed with water and saturated brine, dried over anhydrous Na2SO4, and concentrated under reduced pressure. The residue was purified by silica gel column chromatography (petroleum ether/ethyl acetate 4:1) to give **8a** as a yellow oil. **8a** (646 mg, 1.44 mmol) was dissolved in anhydrous THF (7.0 mL). LiAlH4 (577 μL, 2.88 mmol) was added dropwise in an ice bath, and the mixture was stirred for 1 h. Water and 1 N NaOH were added dropwise alternately in an ice bath until gas evolution ceased. The mixture was filtered through a pad of silica gel, the pad was washed with ethyl acetate, and the combined filtrates were dried over anhydrous Na2SO4 and concentrated under reduced pressure to afford **9c**. **9c** (310 mg, 0.82 mmol) and tetrabutylammonium hydrogen sulfate (139.5 mg, 0.41 mmol) were dissolved in toluene (4.1 mL) and stirred vigorously. A 40% aqueous KOH solution (4.1 mL) was added dropwise in an ice bath, followed by tert-butyl bromoacetate (192 mg, 0.98 mmol). The mixture was stirred at room temperature for 3 h, diluted with ice water, and extracted with ethyl acetate. The organic layer was washed with water and saturated brine, dried over anhydrous Na2SO4, and concentrated under reduced pressure to give **10c**. **10c** (622 mg, 1.27 mmol) was dissolved in anhydrous THF (6.4 mL). LiAlH4 (1.0 mL, 2.54 mmol) was added dropwise in an ice bath, and the mixture was stirred for 1 h. Water and 1 N NaOH were added alternately in an ice bath until gas evolution ceased. The mixture was filtered through a pad of silica gel, the pad was washed with ethyl acetate, and the combined filtrates were dried over anhydrous Na2SO4 and concentrated under reduced pressure to give **11d**. **11d** (504 mg, 1.20 mmol) and tetrabutylammonium hydrogen sulfate (204 mg, 0.60 mmol) were dissolved in toluene (6.0 mL) and stirred vigorously. A 40% aqueous KOH solution (6.0 mL) was added dropwise in an ice bath, followed by tert-butyl bromoacetate (281 mg, 1.44 mmol). The mixture was stirred at room temperature for 3 h, diluted with ice water, and extracted with ethyl acetate. The organic layer was washed with water and saturated brine, dried over anhydrous Na2SO4, and concentrated under reduced pressure to give **12d**. **12d** (545 mg, 1.02 mmol) was dissolved in methanol (5.1 mL), and LiOH (245 mg, 10.2 mmol) was added in an ice bath. The mixture was stirred at room temperature overnight. The solvent was removed, the residue was acidified with 1 N HCl, and the mixture was extracted with ethyl acetate (3 × 5 mL). The combined organic layers were dried over Na2SO4 and concentrated under reduced pressure. Purification by silica gel chromatography (petroleum ether/ethyl acetate 1:2) afforded **3d** as a yellow oil (324 mg, 66%). 1H NMR (600 MHz, CDCl3) *δ* 8.19 (s, 1H), 7.44 – 7.41 (m, 2H), 7.35 – 7.32 (m, 2H), 7.29 – 7.26 (m, 1H), 7.26 – 7.20 (m, 5H), 4.80 (p, *J* = 6.7 Hz, 1H), 4.12 (s, 2H), 3.73 – 3.70(m, 4H), 3.68 – 3.65 (m, 8H), 1.27 (d, *J* = 6.7 Hz, 6H).13C NMR (150 MHz, CDCl3) *δ* 171.51, 151.28, 148.26, 138.33, 138.05, 137.90, 128.83, 128.42, 127.15, 127.05, 126.87, 126.20, 126.16, 70.09, 69.55, 69.48, 69.40, 68.96, 67.86, 45.40, 41.11, 19.22.HRMS (ESI+, m/z): calcd for C27H34N3O5+: 480.2493 [M+H]+, found: 480.2499 [M+H]+.

**2-(2-(3-((5,6-diphenylpyrazin-2-yl)(isopropyl)amino)propoxy)ethoxy)acetic acid (3e)**

1H NMR (600 MHz, CDCl3) *δ* 8.16 (s, 1H), 7.42 (d, *J* = 7.3 Hz, 2H), 7.33 (s, 2H), 7.27 (d, *J* = 6.7 Hz, 1H), 7.24 (q, *J* = 5.6 Hz, 5H), 4.87 – 4.83 (m, 1H), 4.16 (s, 2H), 3.75 (s, 2H), 3.61 (dd, *J* = 15.6, 9.8 Hz, 4H), 3.54 (t, *J* = 7.6 Hz, 2H), 2.01 – 1.95 (m, 2H), 1.28 (d, *J* = 6.7 Hz, 6H). 13C NMR (150 MHz, CDCl3) *δ* 172.35, 152.21, 149.59, 139.39, 138.76, 138.59, 129.85, 129.49, 128.16, 128.06, 127.88, 127.22, 126.80, 71.11, 70.12, 68.97, 46.44, 39.76, 29.61, 20.27. HRMS (ESI+, m/z): calcd for C26H32N3O4+: 450.2387 [M+H]+, found: 450.2383 [M+H]+.

**2-(3-(2-((5,6-diphenylpyrazin-2-yl)(isopropyl)amino)ethoxy)propoxy)acetic acid (3f)**

1H NMR (600 MHz, CDCl3) *δ* 8.21 (s, 1H), 7.43 (d, *J* = 7.4 Hz, 2H), 7.37 – 7.33 (m, 2H), 7.31 – 7.23 (m, 7H), 4.82 – 4.78 (m, 1H), 4.07 (s, 2H), 3.70 – 3.63 (m, 8H), 1.95 – 1.84 (m, 2H), 1.28 (d, *J* = 6.7 Hz, 7H). 13C NMR (150 MHz, CDCl3) *δ* 172.68, 152.27, 149.64, 139.00, 138.47, 138.25, 129.74, 129.39, 128.21, 128.03, 127.82, 127.33, 126.40, 69.22, 68.83, 68.08, 67.98, 46.44, 42.03, 29.60, 20.15.HRMS (ESI+, m/z): calcd for C26H31N3O4+: 450.2387 [M+H]+, found: 450.2389 [M+H]+.

**2-(2-(2-((5,6-diphenylpyrazin-2-yl)(isopropyl)amino)ethoxy)propoxy)acetic acid (3g)**

1H NMR (600 MHz, CDCl3) *δ* 8.17 (s, 1H), 7.44 – 7.42(m, 2H), 7.35 – 7.33 (m, 2H), 7.27 (d, *J* = 6.9 Hz, 1H), 7.26 – 7.20 (m, 5H), 4.72 (p, *J* = 6.7 Hz, 1H), 4.12 (d, *J* = 7.0 Hz, 2H), 3.80 – 3.78(m, 1H), 3.76 – 3.70 (m, 2H), 3.68 – 3.61 (m, 3H), 3.47 (dd, *J* = 10.4, 6.7 Hz, 1H), 1.28 (d, *J* = 2.3 Hz, 6H), 1.15 (d, *J* = 6.3 Hz, 3H). 13C NMR (150 MHz, CDCl3) *δ* 152.23, 149.43, 139.46, 139.12, 129.97, 129.56, 128.32, 128.20, 128.01, 127.36, 127.20, 75.11, 67.33, 46.67, 42.28, 20.45, 20.37, 16.26. HRMS (ESI+, m/z): calcd for C26H32N3O4+: 450.2387 [M+H]+, found: 450.2399 [M+H]+.

**2-(2-(2-((5,6-diphenylpyrazin-2-yl)(isopropyl)amino)ethoxy)butoxy)acetic acid (3h)**

1H NMR (600 MHz, DMSO-d6) *δ* 9.49 (s, 1H), 8.65 – 8.62 (m, 2H), 8.58 – 8.54 (m, 5H), 8.52 – 8.48 (m, 3H), 5.96 – 5.91 (m, 1H), 5.27 (s, 2H), 5.03 – 4.99 (m, 1H), 4.93 – 4.89 (m, 1H), 4.88 – 4.85 (m, 2H), 4.75 (d, *J* = 3.0 Hz, 1H), 4.71 – 4.64 (m, 2H), 2.79 – 2.74(m, 1H), 2.70 – 2.65(m, 1H), 2.51 – 2.48 (m, 6H), 2.12 (t, *J* = 7.4 Hz, 3H).. 13C NMR (150 MHz, DMSO-d6) *δ* 171.68, 151.54, 147.94, 139.41, 139.26, 138.45, 129.45, 129.12, 128.10, 127.96, 127.89, 127.83, 126.93, 79.44, 72.47, 67.84, 67.55, 46.09, 24.04, 19.97, 19.87, 9.45. HRMS (ESI+, m/z): calcd for C27H34N3O4+: 464.2544 [M+H]+, found: 464.2551 [M+H]+.

**2-((1-(5,6-diphenylpyrazin-2-yl)azetidin-2-yl)methoxy)acetic acid (4a)**

1H NMR (400 MHz, CDCl3) *δ* 8.19 (s, 1H), 7.46 – 7.37 (m, 2H), 7.36 – 7.19 (m, 8H), 4.72 – 4.59 (m, 1H), 4.21 (s, 2H), 4.18 – 4.04 (m, 2H), 4.01 – 3.90 (m, 2H), 2.47 – 2.44 (m, 2H). 13C NMR (101 MHz, CDCl3) *δ* 173.10, 154.99, 150.06, 141.19, 138.91, 138.68, 129.94, 129.67, 128.48, 128.20, 128.08, 127.60, 74.47, 68.80, 63.13, 48.62, 20.33. HRMS (ESI+, m/z): calcd for C22H22N3O3+: 376.1656 [M+H]+, found: 376.1654 [M+H]+.

**2-(2-((1-(5,6-diphenylpyrazin-2-yl)azetidin-2-yl)methoxy)ethoxy)acetic acid (4b)**

1H NMR (600 MHz, CDCl3) *δ* 8.11 (s, 1H), 7.42 – 7.40 (m, 2H), 7.33 – 7.31 (m, 2H), 7.30 – 7.24 (m, 7H), 4.64 – 4.60 (m, 1H), 4.15 (d, *J* = 3.1 Hz, 2H), 4.07 (dd, *J* = 9.0, 7.4 Hz, 1H), 3.95 – 3.87 (m, 2H), 3.82 – 3.69 (m, 5H), 2.51 – 2.45 (m, 1H), 2.42 – 2.37 (m, 1H). 13C NMR (150 MHz, CDCl3) *δ* 172.37, 154.67, 149.68, 140.93, 138.99, 138.82, 129.74, 129.45, 128.17, 127.99, 127.97, 127.86, 127.28, 74.00, 71.00, 70.65, 68.67, 62.74, 48.36, 20.42. HRMS (ESI+, m/z): calcd for C24H26N3O4+: 420.1918 [M+H]+, found: 420.1905 [M+H]+.

**2-((1-(5,6-diphenylpyrazin-2-yl)azetidin-3-yl)methoxy)acetic acid (4c)**

1H NMR (400 MHz, DMSO-d6) *δ* 7.94 (s, 1H), 7.35 – 7.19 (m, 10H), 4.16 (t, *J* = 8.3 Hz, 2H), 4.07 (s, 2H), 3.90 (dd, *J* = 8.4, 5.5 Hz, 2H), 3.69 (d, *J* = 6.5 Hz, 2H), 3.06 – 3.00 (m, 1H).13C NMR (101 MHz, DMSO-d6) *δ* 171.82, 153.91, 148.76, 139.80, 139.29, 139.23, 129.51, 129.28, 128.19, 128.01, 127.92, 127.87, 127.09, 72.26, 67.48, 53.05, 29.89. HRMS (ESI+, m/z): calcd for C22H22N3O3+: 376.1656 [M+H]+, found: 376.1652 [M+H]+.

**2-(2-((1-(5,6-diphenylpyrazin-2-yl)azetidin-3-yl)oxy)ethoxy)acetic acid (4d)**

1H NMR (600 MHz, CDCl3) *δ* 7.87 (s, 1H), 7.41 – 7.39(m, 2H), 7.31 – 7.29 (m, 2H), 7.27 – 7.22 (m, 7H), 4.56 – 4.53(m, 1H), 4.36 (dd, *J* = 9.1, 6.3 Hz, 2H), 4.14 (s, 2H), 4.09 (dd, *J* = 9.3, 4.4 Hz, 2H), 3.75 – 3.72 (m, 2H), 3.67 – 3.64 (m, 2H). 13C NMR (150 MHz, CDCl3) *δ* 173.44, 154.32, 150.01, 141.17, 139.11, 139.10, 129.96, 129.64, 128.45, 128.17, 128.12, 127.49, 127.47, 70.93, 69.92, 68.83, 68.40, 58.19. HRMS (ESI+, m/z): calcd for C23H24N3O4+: 406.1761 [M+H]+, found: 406.1755 [M+H]+.

**(R)-2-((1-(5,6-diphenylpyrazin-2-yl)pyrrolidin-2-yl)methoxy)acetic acid (4e-R)**

1H NMR (600 MHz, CDCl3) *δ* 8.11 (s, 1H), 7.46 – 7.43 (m, 2H), 7.37 – 7.33 (m, 2H), 7.32 – 7.27 (m, 3H), 7.27 – 7.25 (m, 3H), 4.49 – 4.46(m, 1H), 4.17 (d, *J* = 3.8 Hz, 2H), 3.86 (dd, *J* = 9.5, 4.0 Hz, 1H), 3.74 – 3.69 (m, 1H), 3.64 (dd, *J* = 9.5, 7.4 Hz, 1H), 3.53 – 3.49 (m, 1H), 2.25 – 2.13 (m, 2H), 2.11 – 2.03 (m, 2H). 13C NMR (150 MHz, CDCl3) *δ* 173.83, 151.62, 150.06, 139.43, 139.20, 138.83, 129.92, 129.61, 128.32, 128.14, 128.00, 127.43, 127.37, 71.86, 68.47, 57.18, 47.52, 28.49, 23.60. HRMS (ESI+, m/z): calcd for C23H24N3O3+: 390.1812 [M+H]+, found: 390.1810 [M+H]+.

**(S)-2-((1-(5,6-diphenylpyrazin-2-yl)pyrrolidin-2-yl)methoxy)acetic acid (4e-S)**

1H NMR (600 MHz, CDCl3) *δ* 8.10 (s, 1H), 7.50 – 7.41 (m, 2H), 7.35 – 7.32(m, 2H), 7.31 – 7.26 (m, 3H), 7.25 – 7.23 (m, 3H), 4.48 – 4.45(m, 1H), 4.20 – 4.13 (m, 2H), 3.86 (dd, *J* = 9.5, 4.0 Hz, 1H), 3.74 – 3.69 (m, 1H), 3.64 (dd, *J* = 9.5, 7.3 Hz, 1H), 3.52 – 3.48(m, 1H), 2.22 – 2.12 (m, 2H), 2.09 – 2.03(m, 2H). 13C NMR (150 MHz, CDCl3) *δ* 173.83, 151.62, 150.06, 139.43, 139.20, 138.83, 129.92, 129.61, 128.32, 128.14, 128.00, 127.43, 127.37, 71.86, 68.47, 57.18, 47.52, 28.49, 23.60. HRMS (ESI+, m/z): calcd for C23H24N3O3+: 390.1812 [M+H]+, found: 390.1810 [M+H]+.

**(*R*)-2-(2-((1-(5,6-diphenylpyrazin-2-yl)pyrrolidin-2-yl)methoxy)ethoxy)acetic acid (4f-R)**

1H NMR (600 MHz, CDCl3) *δ* 8.04 (s, 1H), 7.43 – 7.41 (m, 2H), 7.32 (d, *J* = 6.0 Hz, 2H), 7.28 (d, *J* = 7.4 Hz, 1H), 7.24 (dd, *J* = 9.9, 6.9 Hz, 5H), 4.41 – 4.38(m, 1H), 4.10 (s, 2H), 3.77 (dd, *J* = 9.8, 3.8 Hz, 1H), 3.68 (d, *J* = 9.2 Hz, 5H), 3.55 – 3.45 (m, 2H), 2.12 – 2.01 (m, 4H). 13C NMR (150 MHz, CDCl3) *δ* 151.50, 149.79, 139.74, 139.45, 139.22, 129.96, 129.59, 128.32, 128.17, 128.02, 127.84, 127.31, 71.70, 71.16, 70.62, 57.17, 47.50, 28.61, 23.63. HRMS (ESI+, m/z): calcd for C25H28N3O4+: 434.2074 [M+H]+, found: 434.2061 [M+H]+.

**(*S*)-2-(2-((1-(5,6-diphenylpyrazin-2-yl)pyrrolidin-2-yl)methoxy)ethoxy)acetic acid (4f-S)**

1H NMR (600 MHz, CDCl3) *δ* 8.04 (s, 1H), 7.44 – 7.42 (m, 2H), 7.34 – 7.32 (m, 2H), 7.28 – 7.26 (m, 1H), 7.25 – 7.21 (m, 5H), 4.43 – 4.39 (m, 1H), 4.11 (s, 2H), 3.79 (dd, *J* = 9.7, 4.0 Hz, 1H), 3.71 – 3.66 (m, 5H), 3.55 (dd, *J* = 9.7, 7.5 Hz, 1H), 3.50 – 3.45 (m, 1H), 2.12 – 2.03 (m, 4H).. 13C NMR (150 MHz, CDCl3) *δ* 172.18, 151.25, 149.48, 139.73, 139.32, 139.14, 129.77, 129.39, 128.12, 127.98, 127.83, 127.80, 127.10, 71.62, 71.15, 70.32, 56.95, 47.32, 28.42, 23.48.. HRMS (ESI+, m/z): calcd for C25H28N3O4+: 434.2074 [M+H]+, found: 434.2086 [M+H]+.

**2-((1-(5,6-diphenylpyrazin-2-yl)pyrrolidin-3-yl)oxy)acetic acid (4g)**

1H NMR (600 MHz, CDCl3) *δ* 8.02 (s, 1H), 7.47 – 7.42 (m, 2H), 7.34 – 7.31 (m, 2H), 7.30 – 7.26 (m, 3H), 7.26 – 7.23 (m, 3H), 4.40 – 4.34 (m, 1H), 4.16 (s, 2H), 3.85 (d, *J* = 11.8 Hz, 1H), 3.76 – 3.70 (m, 4H), 2.32 – 2.25 (m, 1H), 2.20 – 2.11 (m, 1H). 13C NMR (150 MHz, CDCl3) *δ* 151.42, 150.19, 139.52, 139.30, 139.01, 130.01, 129.64, 128.39, 128.18, 128.05, 127.37, 127.20, 79.22, 55.08, 52.05, 44.65, 31.14. HRMS (ESI+, m/z): calcd for C22H22N3O3+: 376.1656 [M+H]+, found: 376.1652 [M+H]+.

**2-(2-((1-(5,6-diphenylpyrazin-2-yl)pyrrolidin-3-yl)oxy)ethoxy)acetic acid (4h)**

1H NMR (600 MHz, CDCl3) *δ* 7.96 (s, 1H), 7.44 – 7.43(m, 2H), 7.33 – 7.31 (m, 2H), 7.28 – 7.27 (m, 1H), 7.26 – 7.20 (m, 5H), 4.32 – 4.30(m, 1H), 4.13 (s, 2H), 3.75 – 3.68(m, 8H), 2.27 – 2.14 (m, 2H). 13C NMR (150 MHz, CDCl3) *δ* 151.14, 149.76, 139.49, 139.26, 139.10, 139.08, 129.81, 129.41, 128.13, 127.95, 127.84, 127.06, 78.78, 71.17, 71.15, 68.27, 51.64, 44.45, 31.05. HRMS (ESI+, m/z): calcd for C24H26N3O4+: 420.1918 [M+H]+, found: 420.1901 [M+H]+.

**(*R*)-2-(2-((1-(5,6-diphenylpyrazin-2-yl)pyrrolidin-2-yl)methoxy)-2-methylpropoxy)acetic acid (4i-R)**

1H NMR (600 MHz, CDCl3) *δ* 8.02 (s, 1H), 7.44 – 7.42(m, 2H), 7.34 – 7.32 (m, 2H), 7.29 – 7.26 (m, 1H), 7.26 – 7.20 (m, 6H), 4.30 (d, *J* = 9.8 Hz, 1H), 4.10 (s, 2H), 3.83 (dd, *J* = 9.1, 3.8 Hz, 1H), 3.68 – 3.64 (m, 1H), 3.47 – 3.42 (m, 3H), 3.33 (t, *J* = 8.8 Hz, 1H), 2.13 – 2.08 (m, 2H), 2.07 – 2.04 (m, 2H), 1.18 (d, *J* = 8.8 Hz, 6H). 13C NMR (150 MHz, CDCl3) *δ* 172.36, 151.24, 149.57, 139.28, 139.13, 129.79, 129.37, 128.06, 127.95, 127.78, 127.75, 127.71, 127.05, 79.14, 75.60, 68.92, 62.07, 57.80, 47.25, 28.35, 23.28, 21.90, 21.86.. HRMS (ESI+, m/z): calcd for C27H32N3O4+: 462.2387 [M+H]+, found: 462.2387 [M+H]+.

**(*S*)-2-(2-((1-(5,6-diphenylpyrazin-2-yl)pyrrolidin-2-yl)methoxy)-2-methylpropoxy)acetic acid (4i-S)**

1H NMR (600 MHz, CDCl3) *δ* 8.01 (s, 1H), 7.44 – 7.42(m, 2H), 7.34 – 7.32 (m, 2H), 7.28 – 7.27(m, 1H), 7.25 – 7.21 (m, 5H), 4.32 – 4.29(m, 1H), 4.11 (s, 2H), 3.84 (dd, *J* = 9.1, 3.9 Hz, 1H), 3.68 – 3.65 (m, 1H), 3.48 – 3.42 (m, 3H), 3.34 (t, *J* = 8.8 Hz, 1H), 2.13 – 2.03 (m, 4H), 1.18 (d, *J* = 9.6 Hz, 6H). 13C NMR (150 MHz, CDCl3) *δ* 172.76, 151.63, 149.93, 140.13, 139.75, 139.64, 130.22, 129.79, 128.48, 128.38, 128.20, 128.18, 127.47, 79.72, 76.06, 69.38, 62.53, 58.24, 47.68, 28.78, 23.73, 22.25. HRMS (ESI+, m/z): calcd for C27H32N3O4+: 462.2387 [M+H]+, found: 462.2397 [M+H]+.

**2-((1-(5,6-diphenylpyrazin-2-yl)pyrrolidin-3-yl)methoxy)acetic acid (4j)**

1H NMR (600 MHz, CDCl3) *δ* 7.68 (s, 1H), 7.29 – 7.23 (m, 2H), 7.22 – 7.17 (m, 2H), 7.13 – 7.01 (m, 6H), 3.96 – 3.90 (m, 1H), 3.80 – 3.71 (m, 2H), 3.63 (s, 2H), 3.47 – 3.36 (m, 3H), 3.25 – 3.17 (m, 1H), 1.94 – 1.86 (m, 1H), 1.79 – 1.68 (m, 1H). 13C NMR (150 MHz, CDCl3) *δ* 151.56, 150.34, 139.28, 138.86, 138.84, 130.00, 129.65, 128.35, 128.16, 128.02, 127.34, 127.09, 73.42, 68.25, 49.68, 46.08, 38.85, 27.96. HRMS (ESI+, m/z): calcd for C23H24N3O3+: 390.1812 [M+H]+, found: 390.1810 [M+H]+.

**2-((1-(5,6-diphenylpyrazin-2-yl)piperidin-2-yl)methoxy)acetic acid (4k)**

1H NMR (600 MHz, CDCl3) *δ* 8.28 (s, 1H), 7.42 – 7.39 (m, 2H), 7.34 – 7.29 (m, 2H), 7.28 – 7.21 (m, 7H), 4.83 (d, *J* = 6.7 Hz, 1H), 4.45 (d, *J* = 13.3 Hz, 1H), 4.09 (s, 2H), 3.79 (d, *J* = 7.1 Hz, 2H), 3.05 – 3.00 (m, 1H), 1.97 (d, *J* = 13.2 Hz, 1H), 1.80 (d, *J* = 12.7 Hz, 1H), 1.74 – 1.70 (m, 2H), 1.65 (dd, *J* = 12.9, 3.4 Hz, 1H), 1.60 – 1.55(m, 1H). 13C NMR (150 MHz, CDCl3) *δ* 173.28, 153.13, 149.58, 139.21, 139.18, 138.61, 129.97, 129.63, 128.39, 128.19, 128.05, 127.48, 127.22, 69.20, 68.27, 50.20, 40.16, 25.55, 25.28, 19.49. HRMS (ESI+, m/z): calcd for C24H26N3O3+: 404.1969 [M+H]+, found: 404.1991 [M+H]+.

**2-(2-((1-(5,6-diphenylpyrazin-2-yl)piperidin-2-yl)methoxy)ethoxy)acetic acid (4l)**

1H NMR (600 MHz, CDCl3) *δ* 8.25 (s, 1H), 7.46 – 7.40 (m, 2H), 7.37 – 7.32 (m, 2H), 7.27 (d, *J* = 7.3 Hz, 1H), 7.26 – 7.19 (m, 5H), 4.81 – 4.78 (m, 1H), 4.44 (dd, *J* = 13.3, 4.3 Hz, 1H), 4.07 (s, 2H), 3.74 (d, *J* = 7.0 Hz, 2H), 3.68 – 3.59 (m, 4H), 3.05 – 3.00 (m, 1H), 1.99 – 1.93 (m, 1H), 1.85 – 1.78 (m, 1H), 1.77 – 1.56 (m, 4H). 13C NMR (150 MHz, CDCl3) *δ* 172.76, 152.93, 149.31, 139.17, 138.66, 129.87, 129.49, 128.27, 128.10, 127.94, 127.34, 127.19, 71.06, 70.41, 68.72, 68.67, 50.03, 40.03, 25.48, 25.21, 19.34. HRMS (ESI+, m/z): calcd for C26H30N3O4+: 448.2631 [M+H]+, found: 448.2228 [M+H]+.

**2-((1-(5,6-diphenylpyrazin-2-yl)piperidin-3-yl)oxy)acetic acid (4m)**

1H NMR (600 MHz, CDCl3) *δ* 8.32 (s, 1H), 7.42 – 7.39 (m, 2H), 7.33 – 7.30 (m, 2H), 7.28 – 7.26 (m, 1H), 7.26 – 7.22 (m, 5H), 4.24 – 4.15 (m, 3H), 4.04 – 3.98 (m, 1H), 3.64 – 3.59 (m, 1H), 3.51 – 3.45 (m, 1H), 3.40 – 3.34 (m, 1H), 2.11 – 2.05 (m, 1H), 1.94 – 1.88 (m, 1H), 1.74 – 1.66 (m, 1H), 1.63 – 1.55 (m, 1H). 13C NMR (150 MHz, CDCl3) *δ* 153.12, 149.73, 139.83, 139.08, 138.59, 129.94, 129.62, 128.43, 128.20, 128.06, 127.55, 127.38, 74.73, 48.92, 44.90, 30.24, 29.81, 22.48. HRMS (ESI+, m/z): calcd for C23H24N3O3+: 390.1812 [M+H]+, found: 390.1810 [M+H]+.

**2-(2-((1-(5,6-diphenylpyrazin-2-yl)piperidin-3-yl)oxy)ethoxy)acetic acid (4n)**

1H NMR (600 MHz, CDCl3) *δ* 8.24 (s, 1H), 7.43 – 7.40 (m, 2H), 7.34 – 7.32 (m, 2H), 7.28 – 7.27 (m, 1H), 7.26 – 7.17 (m, 5H), 4.22 – 4.18 (m, 1H), 4.11 (d, *J* = 2.7 Hz, 2H), 3.97 (dd, *J* = 13.4, 4.6 Hz, 1H), 3.78 – 3.69 (m, 4H), 3.58 – 3.54 (m, 1H), 3.42 – 3.32 (m, 2H), 2.10 – 2.06 (m, 1H), 1.92 – 1.89 (m, 1H), 1.72 – 1.57 (m, 2H). 13C NMR (150 MHz, CDCl3) *δ* 152.97, 149.45, 140.08, 139.25, 138.89, 129.94, 129.57, 128.40, 128.21, 128.07, 127.55, 127.48, 74.38, 71.50, 68.92, 67.96, 48.63, 45.00, 30.46, 22.50.HRMS (ESI+, m/z): calcd for C25H28N3O4+: 434.2074 [M+H]+, found: 434.2061 [M+H]+.

**2-((1-(5,6-diphenylpyrazin-2-yl)piperidin-4-yl)oxy)acetic acid (4o)**

1H NMR (600 MHz, CDCl3) *δ* 8.25 (s, 1H), 7.45 – 7.41 (m, 2H), 7.36 – 7.32 (m, 2H), 7.29 – 7.26 (m, 2H), 7.26 – 7.23 (m, 4H), 4.20 – 4.10 (m, 4H), 3.75 – 3.68 (m, 1H), 3.41 – 3.31 (m, 2H), 2.07 – 1.98 (m, 2H), 1.80 – 1.71 (m, 2H). 13C NMR (150 MHz, CDCl3) *δ* 152.89, 149.64, 140.20, 139.15, 138.78, 129.96, 129.58, 128.45, 128.22, 128.08, 127.54, 127.42, 75.97, 44.67, 42.28, 30.52, 28.66. HRMS (ESI+, m/z): calcd for C23H24N3O3+: 390.1812 [M+H]+, found: 390.1809 [M+H]+.

**2-(2-((1-(5,6-diphenylpyrazin-2-yl)piperidin-4-yl)oxy)ethoxy)acetic acid (4p)**

1H NMR (600 MHz, CDCl3) *δ* 8.23 (s, 1H), 7.43 – 7.41(m, 2H), 7.34 – 7.32 (m, 2H), 7.27 (dd, *J* = 6.4, 2.2 Hz, 1H), 7.26 – 7.21 (m, 5H), 4.17 (s, 2H), 4.13 – 4.08 (m, 2H), 3.76 (dd, *J* = 6.0, 3.0 Hz, 2H), 3.71 (dd, *J* = 5.7, 3.2 Hz, 2H), 3.69 – 3.66 (m, 1H), 3.40 – 3.36(m, 2H), 2.05 – 2.00 (m, 2H), 1.75 – 1.69 (m, 2H).. 13C NMR (150 MHz, CDCl3) *δ* 172.66, 152.69, 149.36, 139.97, 138.99, 138.64, 129.75, 129.36, 128.21, 127.99, 127.85, 127.29, 127.24, 75.37, 71.38, 68.67, 67.03, 42.04, 30.32.HRMS (ESI+, m/z): calcd for C25H28N3O4+: 434.2074 [M+H]+, found: 434.2086 [M+H]+.

# Antiaggregatory Activity

**Table S1.** S score from virtual molecular docking and antiaggregatory activityof the designed compounds.a

| Compds | Structures | Platelet IC50 (μM) | S values (kcal/mol) | Compds | Structures | Platelet IC50 (μM) | S values (kcal/mol) |
| --- | --- | --- | --- | --- | --- | --- | --- |
| 2 |  | 6.2 | -10.9 | 4f-R |  | 10.2 | -11.0 |
| 3a |  | >100 | -9.7 | 4f-S |  | >100 | -11.1 |
| 3b |  | >100 | -10.5 | 4g |  | >25 | -9.0 |
| 3c |  | 20.0 | -11.1 | 4h |  | >100 | -10.6 |
| 3d |  | >100 | -11.3 | 4i-R |  | 9.2 | -11.6 |
| 3e |  | 40.0 | -11.3 | 4i-S |  | >100 | -11.6 |
| 3f |  | 41.3 | -11.5 | 4j |  | 18.8 | -9.9 |
| 3g |  | 2.8 | -11.4 | 4k |  | >50 | -9.6 |
| 3h |  | 11.7 | -11.1 | 4l |  | >100 | -11.3 |
| 3i |  | 2.0 | -11.9 | 4m |  | >25 | -9.3 |
| 4a |  | >25 | -9.2 | 4n |  | >100 | -11.0 |
| 4b |  | >100 | -10.8 | 4o |  | 6.5 | -9.7 |
| 4c |  | >25 | -8.9 | 4p |  | >100 | -10.6 |
| 4d |  | >100 | -10.3 | 4q-R |  | 1.25 | -10.5 |
| 4e |  | >100 | -9.8 | 4q-S |  | 0.15 | -10.5 |

a Inhibition of platelet aggregation induced by ADP (300 μM) in rabbit platelet-rich plasma and compounds tested in the sodium salt.

# The Molecular Dynamics Simulation

The cryo‑EM structure of IP receptor (PDB code: 8X79)5 was adopted as the starting point. The missing amino acid residues of the IP receptor were modeled in by referring to the optimized structure of the IP receptor-MRE-269 complex in the GPCRdb database6. The selected derivatives were docked into the binding pocket of the IP receptor in accordance with the Molecular Operating Environment (MOE)7, docking protocol. Taking the native binding pose of MRE-269 as a reference, the docking result with the optimal binding mode was selected as the initial coordinates of the complex.

The CHARMM-GUI web server8 was employed to build the 1-palmitoyl-2-oleoylsn-glycero-3-phosphocholine (POPC) bilayers around the transmembrane domain (TMD) of IP receptor for each system. The receptor crystal structure pre-aligned in the OPM (Orientations of Proteins in Membranes) database9 to determine the position of a protein in the membrane. The membrane-inserted IP receptor complex was solvated with a truncated rectangular box of TIP3P water molecules and neutralized with a concentration of 0.15 M NaCl. The protein was modeled using the AMBER FF19SB force field10, the MRE-269 and derivatives were modeled using the generalized AMBER force field (GAFF)11, and the LIPID21 force field12 was utilized for POPC. Geometry optimization and the electrostatic potential calculations on MRE-269 and derivatives were performed at the HF/6-31G* level in Gaussian16 software, and the partial charges were calculated with the RESP13.

The energy minimization and equilibration were conducted by Amber24. First, to remove bad contacts in the initial structures, the steepest descent and the conjugated gradient methods were carried out. After energy minimization, each system was gradually heated in the NVT ensemble from 0 to 300 K in 200 ps. Subsequently, constant temperature equilibration at 300 K for a total of 800 ps was performed to adjust the solvent density in the NPT ensemble with periodic boundary conditions. Finally, conventional molecular dynamics (cMD) simulations with a duration of 300 ns were carried out for each system, using an integration time step of 2 fs. The particle mesh Ewald (PME) method was employed to treat long-range electrostatic interactions, while the non-bonded interactions were calculated based on a cutoff of 10 Å. The SHAKE algorithm was applied to constrain all covalent bonds involving hydrogen atoms.

MM/GBSA was used to estimate the binding free energy of MRE-269 and derivatives interacting with IP receptor.


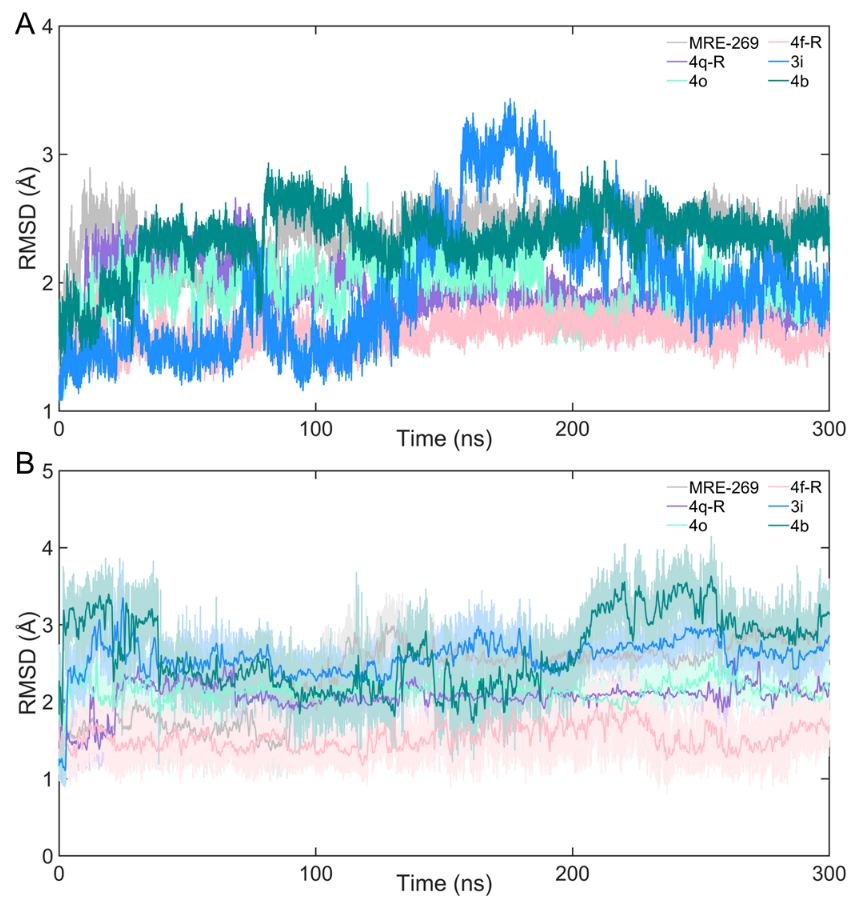


**Figure S1.** A, The RMSD of backbone atoms of IP receptor. B, The RMSDs of MRE-269 and derivatives during cMD simulations.


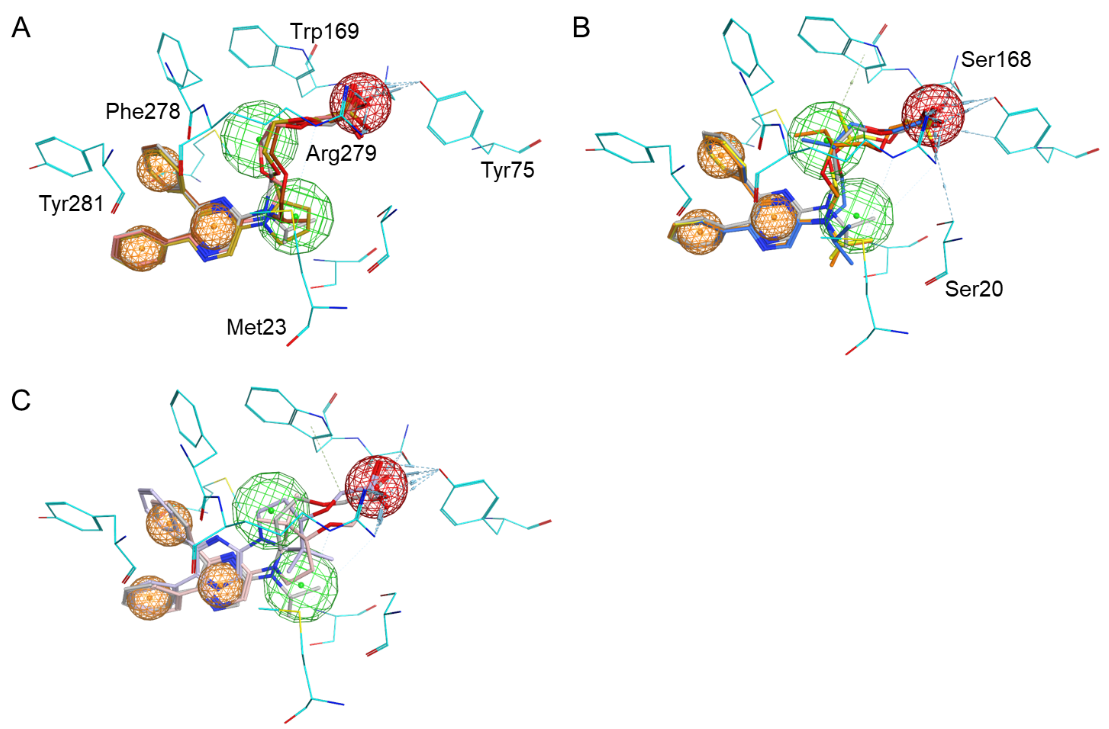


**Figure S2.** The aligned poses of MRE-269 (gray) and derivatives superposed with common feature-based pharmacophore models. A, 4b (darkcyan), 4d (moccasin) and 4f-R (pink). B, 3g (yellow), 3h (orange), and 3i (blue). C, B, 4o (aquamarine), 4q-R (mediumpurple), and 4q-S (plum red).


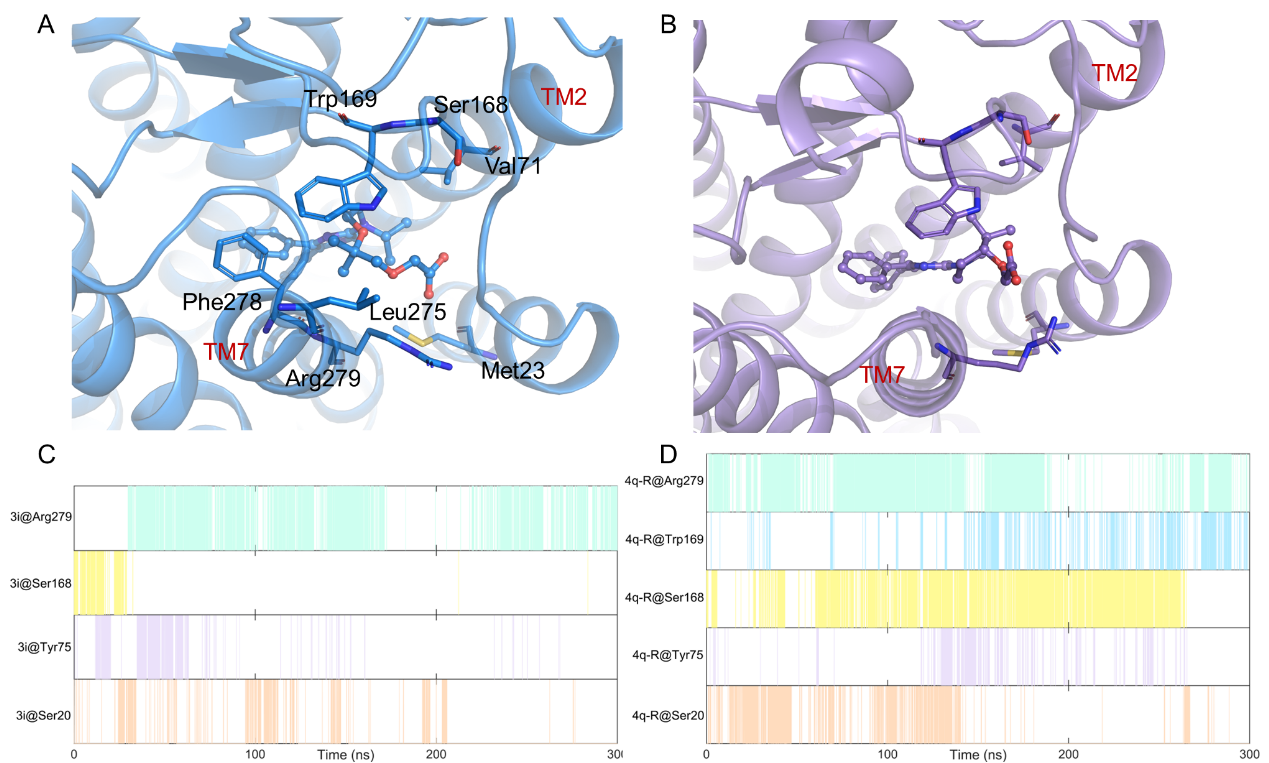


**Figure S3.** Binding mode of 3i (A) and 4q-R (B) derived from cMD simulations.

Hydrogen bonds formed between carboxyl ends of 3i (C) and 4q-R (D) and surrounding residues.

Table S2. MM-GBSA binding energy of MRE-269 and derivatives.

|  | MRE-269 | 3i | 4b | 4f-R | 4o | 4q-R |
| --- | --- | --- | --- | --- | --- | --- |
| ∆Evdw (kcal/mol) | -66.11 | -71.44 | -62.66 | -63.70 | -62.21 | -61.83 |
| ∆Eele (kcal/mol) | -15.97 | -18.43 | -4.74 | -18.28 | -20.80 | -29.67 |
| ∆EGB (kcal/mol) | 31.57 | 38.92 | 32.80 | 36.28 | 34.82 | 37.39 |
| ∆ESURF (kcal/mol) | -8.29 | -8.82 | -8.44 | -7.83 | -8.19 | -7.74 |
| ∆Gbinding (kcal/mol) | -58.80 | -59.77 | -43.04 | -53.53 | -56.38 | -61.85 |
| IC50 (μM) | 6.2 | 2.0 | >100 | 10.2 | 6.5 | 1.25 |

∆Evdw: Van der Waals energy; ∆Eele: electrostatic energy; ∆EGB: polar solvation energy; ∆ESURF: nonpolar solvation energy; ∆Hbinding: enthalpic contributions.

# Mini-Ames Test of 4q-S using Salmonella typhimurium and Escherichia coli strains.

Results showed that test compound 4q-S was evaluated across all strains (TA98, TA100, TA1535, TA1537, and WP2 uvrA (pKM101)) in the presence and absence of S9 metabolic activation. No cytotoxicity was observed at test any dose level. The mean number of revertant colonies for all strains remained below the 2-fold threshold of the negative/solvent control group (for TA98, TA100, and WP2 uvrA (pKM101)) or 3-fold (for TA1535 and TA1537). Additionally, no dose-dependent increase was observed.

**Table S3.** Revertant Colony Counts in the Definitive Mutagenicity Assay.

| **Test Article:** | **4q-S** | **Solvent Control Article:** | | | | **DMSO** | | | |
| --- | --- | --- | --- | --- | --- | --- | --- | --- | --- |
| **Revertant Colony Counts in the Definitive Mutagenicity Assay** | | | | | | | | | |
| **Tester Strain** | **4q-S Dose level (μg/well)** | **S9 mix** | **Individual revertant colony counts** | | | **Mean** | **SD** | **Ratio** | **Background Lawn Codeª** |
| **TA98** | 1.5 | +S9 | 3 | 3 | 6 | 4.00 | 1.73 | 0.75 | N |
| 4 | 5 | 2 | 5 | 4.00 | 1.73 | 0.75 | N |
| 10 | 4 | 3 | 7 | 4.67 | 2.08 | 0.88 | N |
| 25 | 7 | 6 | 11 | 8.00 | 2.65 | 1.50 | N |
| 64 | 5 | 6 | 2 | 4.33 | 2.08 | 0.81 | N |
| 160 | 10 | 11 | 9 | 10.00 | 1.00 | 1.88 | N |
| 400 | 4 | 4 | 4 | 4.00 | 0.00 | 0.75 | N |
| 1000 | 4 | 6 | 5 | 5.00 | 1.00 | 0.94 | N |
| Solvent | 4 | 2 | 6 | 5.33 | 2.42 | 1.00 | N |
| 8 | 8 | 4 |
| Positive Control  (2-AA 0.6) | 473 | 424 | 469 | 455.33 | 27.21 | 85.43 | N |
| 1.5 | -S9 | 7 | 2 | 1 | 3.33 | 3.21 | 0.64 | N |
| 4 | 3 | 8 | 3 | 4.67 | 2.89 | 0.90 | N |
| 10 | 2 | 5 | 8 | 5.00 | 3.00 | 0.97 | N |
| 25 | 2 | 4 | 1 | 2.33 | 1.53 | 0.45 | N |
| 64 | 4 | 2 | 4 | 3.33 | 1.15 | 0.64 | N |
| 160 | 5 | 3 | 2 | 3.33 | 1.53 | 0.64 | N |
| 400 | 5 | 3 | 6 | 4.67 | 1.53 | 0.90 | N |
| 1000 | 1 | 4 | 2 | 2.33 | 1.53 | 0.45 | N |
| Solvent | 6 | 6 | 6 | 5.17 | 1.17 | 1.00 | N |
| 3 | 5 | 5 |
| Positive Control  (2-NF 2) | 182 | 169 | 113 | 154.67 | 36.67 | 29.92 | N |
| **Revertant Colony Counts in the Definitive Mutagenicity Assay** | | | | | | | | | |
| **Tester Strain** | **Dose level (μg/well)** | **S9 mix** | **Individual revertant colony counts** | | | **Mean** | **SD** | **Ratio** | **Background Lawn Codeª** |
| **TA100** | 1.5 | +S9 | 34 | 24 | 18 | 25.33 | 8.08 | 1.00 | N |
| 4 | 28 | 27 | 18 | 24.33 | 5.51 | 0.96 | N |
| 10 | 27 | 18 | 14 | 19.67 | 6.66 | 0.78 | N |
| 25 | 26 | 26 | 23 | 25.00 | 1.73 | 0.99 | N |
| 64 | 18 | 21 | 10 | 16.33 | 5.69 | 0.64 | N |
| 160 | 28 | 26 | 25 | 26.33 | 1.53 | 1.04 | N |
| 400 | 17 | 23 | 20 | 20.00 | 3.00 | 0.79 | N |
| 1000 | 18 | 24 | 21 | 21.00 | 3.00 | 0.83 | N |
| Solvent |  | 25 | 20 | 31 | 25.33 | 3.83 | 1.00 | N |
| 28 | 25 | 23 |
| Positive Control  (2-AA 0.6) | 495 | 574 | 587 | 552.00 | 49.79 | 21.79 | N |
| 1.5 | -S9 | 24 | 26 | 17 | 22.33 | 4.73 | 0.86 | N |
| 4 | 23 | 24 | 20 | 22.33 | 2.08 | 0.86 | N |
| 10 | 20 | 18 | 21 | 19.67 | 1.53 | 0.76 | N |
| 25 | 23 | 20 | 17 | 20.00 | 3.00 | 0.77 | N |
| 64 | 25 | 22 | 23 | 23.33 | 1.53 | 0.90 | N |
| 160 | 25 | 24 | 29 | 26.00 | 2.65 | 1.01 | N |
| 400 | 22 | 14 | 14 | 16.67 | 4.62 | 0.65 | N |
| 1000 | 15 | 12 | 14 | 13.67 | 1.53 | 0.53 | N |
| Solvent | 28 | 20 | 26 | 25.83 | 3.19 | 1.00 | N |
| 25 | 27 | 29 |
| Positive Control  (MNNG 1) | 1760 | 1848 | 1916 | 1841.33 | 78.21 | 71.29 | N |
| **Revertant Colony Counts in the Definitive Mutagenicity Assay** | | | | | | | | | |
| **Tester Strain** | **Dose level (μg/well)** | **S9 mix** | **Individual revertant colony counts** | | | **Mean** | **SD** | **Ratio** | **Background Lawn Codeª** |
| **TA1535** | 1.5 | +S9 | 3 | 5 | 3 | 3.67 | 1.15 | 1.84 | N |
| 4 | 1 | 1 | 2 | 1.33 | 0.58 | 0.67 | N |
| 10 | 1 | 1 | 2 | 1.33 | 0.58 | 0.67 | N |
| 25 | 3 | 3 | 2 | 2.67 | 0.58 | 1.34 | N |
| 64 | 2 | 0 | 2 | 1.33 | 1.15 | 0.67 | N |
| 160 | 1 | 1 | 2 | 1.33 | 0.58 | 0.67 | N |
| 400 | 2 | 0 | 2 | 1.33 | 1.15 | 0.67 | N |
| 1000 | 2 | 3 | 2 | 2.33 | 0.58 | 1.17 | N |
| Solvent | 0 | 4 | 2 | 2.00 | 1.41 | 1.00 | N |
| 3 | 2 | 1 |
| Positive Control  (2-AA 0.6) | 62 | 63 | 47 | 57.33 | 8.96 | 28.67 | N |
| 1.5 | -S9 | 3 | 1 | 3 | 2.33 | 1.15 | 1.99 | N |
| 4 | 1 | 2 | 2 | 1.67 | 0.58 | 1.43 | N |
| 10 | 3 | 2 | 1 | 2.00 | 1.00 | 1.71 | N |
| 25 | 0 | 2 | 3 | 1.67 | 1.53 | 1.43 | N |
| 64 | 0 | 1 | 1 | 0.67 | 0.58 | 0.57 | N |
| 160 | 0 | 0 | 1 | 0.33 | 0.58 | 0.28 | N |
| 400 | 1 | 2 | 1 | 1.33 | 0.58 | 1.14 | N |
| 1000 | 1 | 0 | 2 | 1.00 | 1.00 | 0.85 | N |
| Solvent | 1 | 2 | 2 | 1.17 | 0.75 | 1.00 | N |
| 1 | 0 | 1 |
| Positive Control  (MNNG 1) | 1984 | 2128 | 2024 | 2045.33 | 74.33 | 1748.15 | N |
| **Revertant Colony Counts in the Definitive Mutagenicity Assay** | | | | | | | | | |
| **Tester Strain** | **Dose level (μg/well)** | **S9 mix** | **Individual revertant colony counts** | | | **Mean** | **SD** | **Ratio** | **Background Lawn Codeª** |
| **TA1537** | 1.5 | +S9 | 2 | 2 | 1 | 1.67 | 0.58 | 1.67 | N |
| 4 | 0 | 1 | 0 | 0.33 | 0.58 | 0.33 | N |
| 10 | 3 | 2 | 0 | 1.67 | 1.53 | 1.67 | N |
| 25 | 1 | 2 | 1 | 1.33 | 0.58 | 1.33 | N |
| 64 | 0 | 1 | 0 | 0.33 | 0.58 | 0.33 | N |
| 160 | 1 | 2 | 1 | 1.33 | 0.58 | 1.33 | N |
| 400 | 0 | 1 | 1 | 0.67 | 0.58 | 0.67 | N |
| 1000 | 0 | 1 | 1 | 0.67 | 0.58 | 0.67 | N |
| Solvent | 1 | 2 | 0 | 1.00 | 0.63 | 1.00 | N |
| 1 | 1 | 1 |
| Positive Control  (2-AA 0.6) | 51 | 53 | 54 | 52.67 | 1.53 | 52.67 | N |
| 1.5 | -S9 | 1 | 2 | 2 | 1.67 | 0.58 | 1.67 | N |
| 4 | 1 | 2 | 1 | 1.33 | 0.58 | 1.33 | N |
| 10 | 2 | 1 | 1 | 1.33 | 0.58 | 1.33 | N |
| 25 | 1 | 2 | 3 | 2.00 | 1.00 | 2.00 | N |
| 64 | 2 | 2 | 2 | 2.00 | 0.00 | 2.00 | N |
| 160 | 1 | 0 | 0 | 0.33 | 0.58 | 0.33 | N |
| 400 | 2 | 1 | 1 | 1.33 | 0.58 | 1.33 | N |
| 1000 | 1 | 1 | 0 | 0.67 | 0.58 | 0.67 | N |
| Solvent | 0 | 1 | 3 | 1.00 | 1.26 | 1.00 | N |
| 0 | 0 | 2 |
| Positive Control  (ICR-191 0.2) | 60 | 42 | 71 | 57.67 | 14.64 | 57.67 | N |
| **Revertant Colony Counts in the Definitive Mutagenicity Assay** | | | | | | | | | |
| **Tester Strain** | **Dose level (μg/well)** | **S9 mix** | **Individual revertant colony counts** | | | **Mean** | **SD** | **Ratio** | **Background Lawn Codeª** |
| **WP2 uvrA (pKM101)** | 1.5 | +S9 | 22 | 27 | 25 | 24.67 | 2.52 | 1.08 | N |
| 4 | 13 | 26 | 26 | 21.67 | 7.51 | 0.95 | N |
| 10 | 30 | 20 | 20 | 23.33 | 5.77 | 1.02 | N |
| 25 | 27 | 33 | 26 | 28.67 | 3.79 | 1.26 | N |
| 64 | 20 | 25 | 23 | 22.67 | 2.52 | 0.99 | N |
| 160 | 21 | 27 | 24 | 24.00 | 3.00 | 1.05 | N |
| 400 | 13 | 19 | 20 | 17.33 | 3.79 | 0.76 | N |
| 1000 | 23 | 12 | 16 | 17.00 | 5.57 | 0.74 | N |
| Solvent | 26 | 19 | 22 | 22.83 | 2.79 | 1.00 | N |
| 23 | 21 | 26 |
| Positive Control  (2-AA 4) | 482 | 429 | 457 | 456.00 | 26.51 | 19.97 | N |
| 1.5 | -S9 | 17 | 10 | 20 | 15.67 | 5.13 | 0.96 | N |
| 4 | 18 | 16 | 10 | 14.67 | 4.16 | 0.90 | N |
| 10 | 20 | 11 | 18 | 16.33 | 4.73 | 1.00 | N |
| 25 | 23 | 26 | 22 | 23.67 | 2.08 | 1.45 | N |
| 64 | 22 | 24 | 20 | 22.00 | 2.00 | 1.35 | N |
| 160 | 17 | 20 | 22 | 19.67 | 2.52 | 1.20 | N |
| 400 | 7 | 12 | 15 | 11.33 | 4.04 | 0.69 | N |
| 1000 | 25 | 15 | 19 | 19.67 | 5.03 | 1.20 | N |
| Solvent | 15 | 20 | 19 | 16.33 | 2.66 | 1.00 | N |
| 16 | 13 | 15 |
| Positive Control  (MNNG 1) | 900 | 1100 | 956 | 985.33 | 103.18 | 60.34 | N |
| ª Cytotoxicity Code: N= Normal; R= Reduced;  A= absent; O= obscured by precipitate;  P= Precipitate;NC=Not counted, pinpoint colonies appeared. | | | | | | | | | |

# hERG Safety Evaluation by Manual Patch-Clamp System

The potential inhibitory effect of test articles on human Ether-à-go-go related gene (hERG) channel were evaluated by using manual patch-clamp system according to the protocols as described in this report. HEK293 cell line stably transfected with hERG gene was employed in this study and Cisapride was used as a positive control to ensure the good quality of the assay. Based on the criteria described in the report, the results are shown in the following table.

(1) Raw data

**Table S4.** The inhibitory effect of compounds on hERG channel.

| Compound ID | Concentration  (μM) | % of hERG inhibition | | Average % of hERG inhibition | SD | IC50 (μM) |
| --- | --- | --- | --- | --- | --- | --- |
| Cell 1 | Cell 2 |
| Cisapride | 0.00137 | 7.40 | 8.88 | 8.14 | 1.05 | 0.026 |
| 0.00412 | 21.04 | 17.10 | 19.07 | 2.78 |  |
| 0.01235 | 37.54 | 34.94 | 36.24 | 1.84 |  |
| 0.03704 | 62.58 | 63.85 | 63.22 | 0.90 |  |
| 0.11111 | 89.53 | 88.83 | 89.18 | 0.50 |  |
| 0.33333 | 97.67 | 99.56 | 98.62 | 1.34 |  |
| Compound ID | Concentration  (μM) | % of hERG inhibition | | Average % of hERG inhibition | SD | IC50 (μM) |
| n=1 | n=2 |
| 4q-S | 0.37 | 7.83 | -1.71 | 3.06 | 6.75 | > 30 |
| 1.11 | 11.43 | 1.08 | 6.26 | 7.32 |  |
| 3.33 | 9.01 | -1.68 | 3.67 | 7.56 |  |
| 10.00 | 11.63 | 5.33 | 8.48 | 4.46 |  |
| 30.00 | 13.57 | 0.43 | 7.00 | 9.29 |  |

(2)Fitting curve:


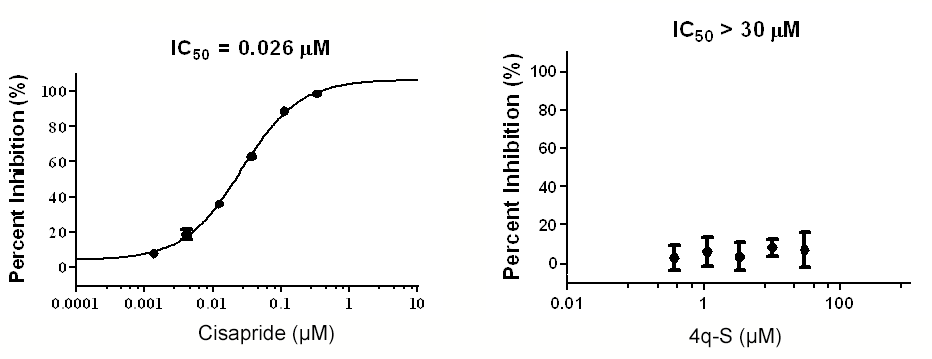


(3) Representative raw current traces responding to vehicle and Cisapride for 6 different doses and Representative raw current traces responding to vehicle and 4q-S for 5 different doses

**Cisapride**


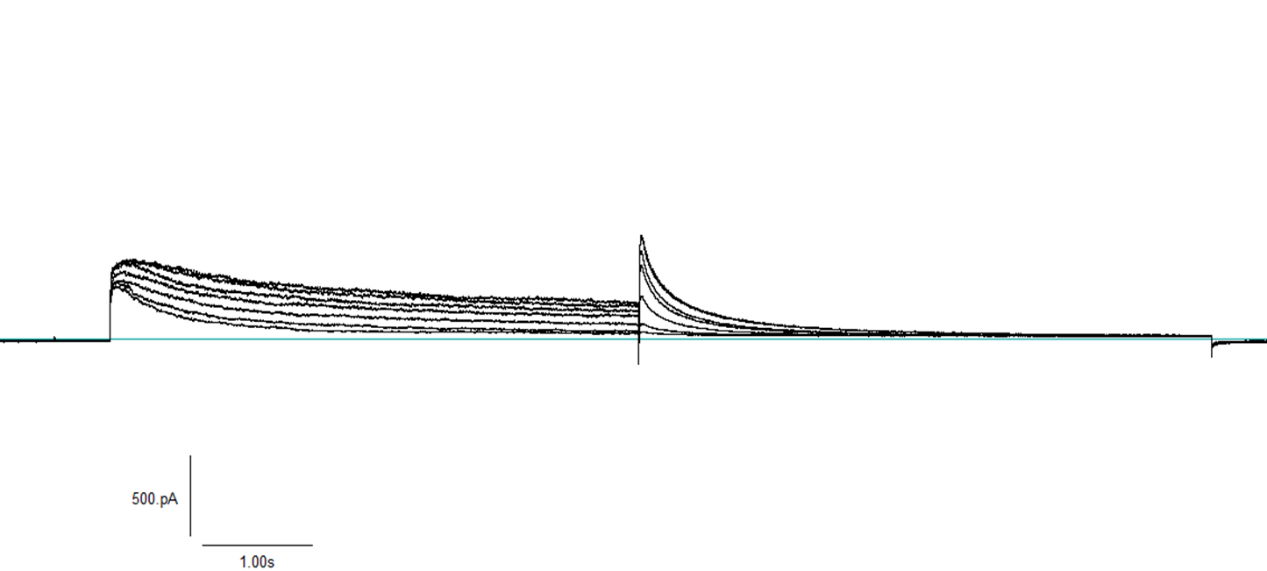


**4q-S**


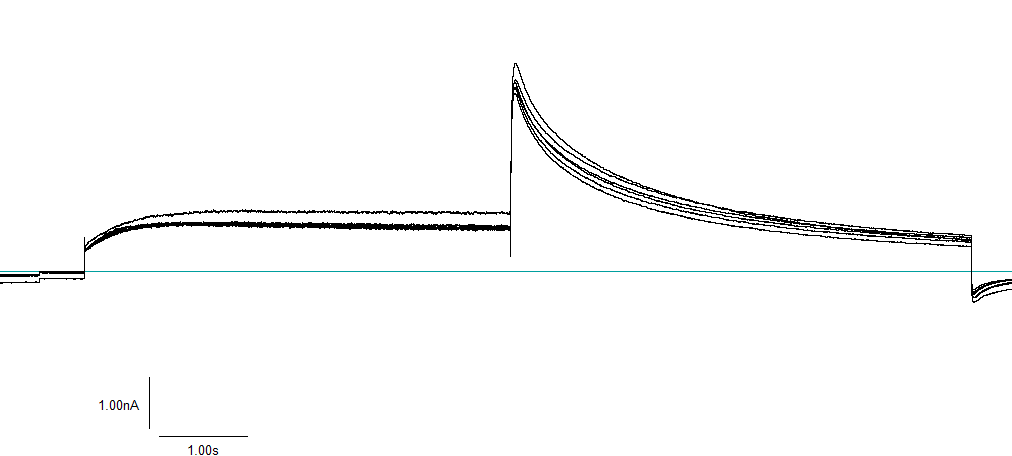


Results showed that Cisapride inhibited the hERG current with an IC₅₀ of 0.026 µM. For test article 4q-S, the IC₅₀ was greater than 30 µM, as only 7.00% inhibition was observed at the 30 µM dose level.

# The NMR spectra of compounds 7a, 7b, 14a, 14c, 14d, 14e, 14g, 14j, 14k, 14m, 14o, 3a-3i and 4a-4n

1. NMR of **7a**

1H NMR of **7a** in CDCl3

13C NMR of **7a** in CDCl3

1. NMR of **3a**

1H NMR of **3a** in CDCl3

13C NMR of **3a** in CDCl3

1. NMR of **7b**

1H NMR of **7b** in CDCl3

13C NMR of **7b** in CDCl3

1. NMR of **3b**

1H NMR of **3b** in CDCl3

13C NMR of **3b** in CDCl3

1. NMR of **3c**

1H NMR of **3c** in CDCl3

13C NMR of **3c** in CDCl3

1. NMR of **3d**

1H NMR of **3d** in CDCl3

13C NMR of **3d** in CDCl3

1. NMR of **3e**

1H NMR of **3e** in CDCl3

13C NMR of **3e** in CDCl3

1. NMR of **3f**

1H NMR of **3f** in CDCl3

13C NMR of **3f** in CDCl3

1. NMR of **3g**

1H NMR of **3g** in CDCl3

13C NMR of **3g** in CDCl3

1. NMR of **3h**

1H NMR of **3h** in DMSO-*d*6

13C NMR of **3h** in DMSO-*d6*

1. NMR of **8i**

1H NMR of **8i** in CDCl3

13C NMR of **8i** in CDCl3

1. NMR of **9i**

1H NMR of **9i** in CDCl3

13C NMR of **9i** in CDCl3

1. NMR of **10i**

1H NMR of **10i** in CDCl3

13C NMR of **10i** in CDCl3

1. NMR of **3i**

1H NMR of **3i** in CDCl3

13C NMR of **3i** in CDCl3

1. NMR of **14a**

1H NMR of **14a** in CDCl3

13C 13C NMR of **14a** in CDCl3

1. NMR of **4a**

1H NMR of **4a** in CDCl3

13C NMR of **4a** in CDCl3

1. NMR of **4b**

1H NMR of **4b** in CDCl3

13C NMR of **4b** in CDCl3

1. NMR of **14c**

1H NMR of **14c** in CDCl3

13C NMR of **14c** in CDCl3

1. NMR of **4c**

1H NMR of **4c** in DMSO-*d*6\

13C NMR of **4c** in DMSO-*d*6

1. NMR of **14d**

1H NMR of **14d** in CDCl3

13C NMR of **14d** in CDCl3

1. NMR of **4d**

1H NMR of **4d** in CDCl3

13C NMR of **4d** in CDCl3

1. NMR of **14e-R**

1H NMR of **14e-R** in CDCl3

13C NMR of **14e-R** in CDCl3

1. NMR of **4e-R**

1H NMR of **4e-R** in CDCl3

13C NMR of **4e-R** in CDCl3

1. NMR of **4e-S**

1H NMR of **4e-****S** in CDCl3

13C NMR of **4e-S** in CDCl3

1. NMR of **4f-R**

1H NMR of **4f-R** in CDCl3

13C NMR of **4f-R** in CDCl3

1. NMR of **4f-S**

1H NMR of **4f-S** in CDCl3

13C NMR of **4f-S** in CDCl3

1. NMR of **14g**

1H NMR of **14g** in CDCl3

13C NMR of **14g** in CDCl3

1. NMR of **4g**

1H NMR of **4g** in CDCl3

13C NMR of **4g** in CDCl3

1. NMR of **4h**

1H NMR of **4h**in CDCl3

13C NMR of **4h** in CDCl3

1. NMR of **4i-R**

1H NMR of **4i-R** in CDCl3

13C NMR of **4i-R** in CDCl3

1. NMR of **4i-S**

1H NMR of **4i-S** in CDCl3

13C NMR of **4i-S** in CDCl3

1. NMR of **14j**

1H NMR of **14j** in CDCl3

13C NMR of **14j** in CDCl3

1. NMR of **4j**

1H NMR of **4j** in CDCl3

13C NMR of **4j** in CDCl3

1. NMR of **14k**

1H NMR of **14k** in CDCl3

13C NMR of **14k** in CDCl3

1. NMR of **4k**

1H NMR of **4k** in CDCl3

13C NMR of **4k** in CDCl3

1. NMR of **4l**

1H NMR of **4l** in CDCl3

13C NMR of **4l** in CDCl3

1. NMR of **14m**

1H NMR of **14m** in CDCl3

13C NMR of **14m** in CDCl3

1. NMR of **4m**

1H NMR of **4m** in CDCl3

13C NMR of **4m** in CDCl3

1. NMR of **4n**

1H NMR of **4n** in CDCl3

13C NMR of **4n** in CDCl3

1. NMR of **14o**

1H NMR of **14o** in CDCl3

13C NMR of **14o** in CDCl3

1. NMR of **4o**

1H NMR of **4o** in CDCl3

13C NMR of **4o** in CDCl3

1. NMR of **4p**

1H NMR of **4p** in CDCl3.

13C NMR of **4p** in CDCl3

**References**

1. Karmas, G.; Spoerri, P. E., The Preparation of Hydroxypyrazines and Derived Chloropyrazines. *J. Am. Chem. Soc.* **1952,** *74* (6), 1580-1584.

2. Mori, D.; Kimura, H.; Kawashima, H.; Yagi, Y.; Arimitsu, K.; Ono, M.; Saji, H., Development of 99mTc radiolabeled A85380 derivatives targeting cerebral nicotinic acetylcholine receptor: novel radiopharmaceutical ligand 99mTc-A-YN-IDA-C4. *Bioorganic & Medicinal Chemistry* **2019,** *27* (18), 4200-4210.

3. Cai, X.; Lin, G.; Tang, J.; Wang, Y.; Cheng, J.; Liu, G.; Wang, Q.; Cheng, C.; Mu, Z.; Zhou, P.; Fu, Q.; An, X., Synthesis and Evaluation of Diphenylpyrazine Cyclic Amine Derivatives as IP Receptor Agonists. *ACS Med. Chem. Lett.* **2025,** *16* (9), 1772–1779.

4. Asaki, T.; Hamamoto, T.; Sugiyama, Y.; Kuwano, K.; Kuwabara, K., Structure-activity studies on diphenylpyrazine derivatives: a novel class of prostacyclin receptor agonists. *Bioorg. Med. Chem.* **2007,** *15* (21), 6692-6704.

5. Wang, J. J.; Jin, S.; Zhang, H.; Xu, Y.; Hu, W.; Jiang, Y.; Chen, C.; Wang, D. W.; Xu, H. E.; Wu, C., Molecular recognition and activation of the prostacyclin receptor by anti-pulmonary arterial hypertension drugs. *Sci. Adv.* **2024,** *10* (6), eadk5184.

6. Pándy-Szekeres, G.; Caroli, J.; Mamyrbekov, A.; Kermani, A. A. Keserű, György M.; Kooistra, Albert J.; Gloriam, D. E., GPCRdb in 2023: state-specific structure models using AlphaFold2 and new ligand resources. *Nucleic Acids Research* **2023,** *51* (D1), D395-D402.

7. Vilar, S.; Cozza, G.; Moro, S., Medicinal chemistry and the molecular operating environment (MOE): application of QSAR and molecular docking to drug discovery. *Current topics in medicinal chemistry* **2008,** *8* (18), 1555–1572.

8. Jo, S.; Kim, T.; Iyer, V. G.; Im, W., CHARMM‐GUI: A web‐based graphical user interface for CHARMM. *Journal of Computational Chemistry* **2008,** *29* (11), 1859-1865.

9. Lomize, M. A.; Pogozheva, I. D.; Joo, H.; Mosberg, H. I.; Lomize, A. L., OPM database and PPM web server: resources for positioning of proteins in membranes. *Nucleic Acids Research* **2012,** *40* (D1), D370-D376.

10. Tian, C.; Kasavajhala, K.; Belfon, K. A. A.; Raguette, L.; Huang, H.; Migues, A. N.; Bickel, J.; Wang, Y.; Pincay, J.; Wu, Q.; Simmerling, C., ff19SB: Amino-Acid-Specific Protein Backbone Parameters Trained against Quantum Mechanics Energy Surfaces in Solution. *Journal of Chemical Theory and Computation* **2019,** *16* (1), 528-552.

11. Wang, J.; Wolf, R. M.; Caldwell, J. W.; Kollman, P. A.; Case, D. A., Development and testing of a general amber force field. *Journal of Computational Chemistry* **2004,** *25* (9), 1157-1174.

12. Dickson, C. J.; Walker, R. C.; Gould, I. R., Lipid21: Complex Lipid Membrane Simulations with AMBER. *Journal of Chemical Theory and Computation* **2022,** *18* (3), 1726-1736.

13. Fox, T.; Kollman, P. A., Application of the RESP Methodology in the Parametrization of Organic Solvents. *J. Phys. Chem. B* **1998,** *102*, 8070-8079.
